# Supplementary material for: T-Cells Expressing a Highly Potent PRAME-Specific T-Cell Receptor in Combination with a Chimeric PD1-41BB Co-Stimulatory Receptor Show a Favorable Preclinical Safety Profile and Strong Anti-Tumor Reactivity
Source: MDPI journal article supplement (doi:10.3390/cancers14081998), 2022-04-14
Supplement: s1 [file s1]

## Supplementary Figures

# T-Cells Expressing a Highly Potent PRAME-Specific T-Cell Receptor in Combination with a Chimeric PD1-41BB Co-Stimulatory Receptor Show a Favorable Preclinical Safety Profile and Strong Anti-Tumor Reactivity

Nadja Sailer, Ina Fetzner, Melanie Salvermoser, Monika Braun, Doris Brechtefeld, Christian Krendl, Christiane Geiger, Kathrin Mutze, Elfriede Noessner, Dolores J. Schendel, Maja Bürdek, Susanne Wilde and Daniel Sommermeyer

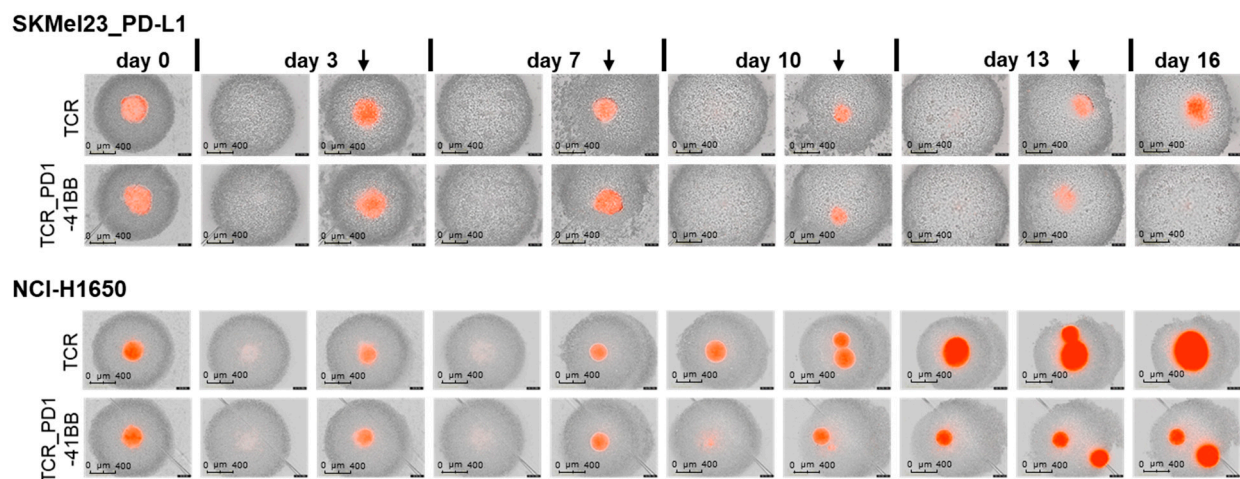

**Figure S1.** Cytotoxicity of TCR-Ts, with or without PD1-41BB, against red fluorescently labelled 3D tumor cell spheroids was monitored over 16 days using the IncuCyte S3® device. T cells were re-challenged with fresh spheroids on day 3, 7, 10 and 13 indicated by black arrows. PD-L1-transduced SKMel23 (PRAME-positive), endogenously PD-L1-expressing NCI-H1650 (PRAME-positive) were used as target cells. For day 3, 7, 10 and 13 pictures before and after adding fresh tumor cell spheroids are shown.

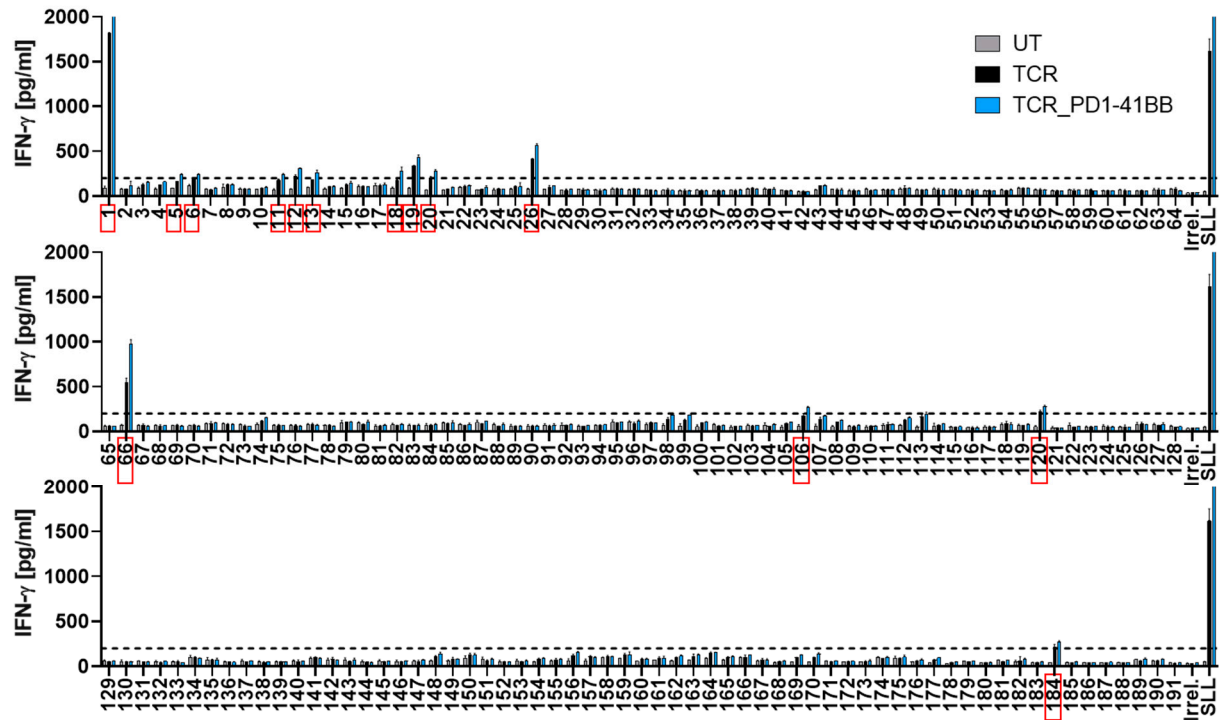

**Figure S2.** Variant peptides were loaded onto T2\_PD-L1 cells at a peptide concentration of  $10^{-6}$  and recognition by TCR-Ts without or with PD1-41BB was tested. UT T cells served as negative control. The specific PRAME-SLL peptide and an irrelevant peptide were used as controls. For read-out, supernatants were harvested after 20 h and analyzed by IFN- $\gamma$  ELISA. The data represent means of duplicates. Peptides that were recognized above the background (200 pg/ml) are marked. Experiments were performed with T cells derived from four different donors; data with cells from one representative donor are shown.
